# Supplementary material for: Tall fescue endophyte effects on tolerance to water-deficit stress
Source: PubMed Central journal article supplement (PMC3848598; doi:10.1186/1471-2229-13-127), 2013-09-09

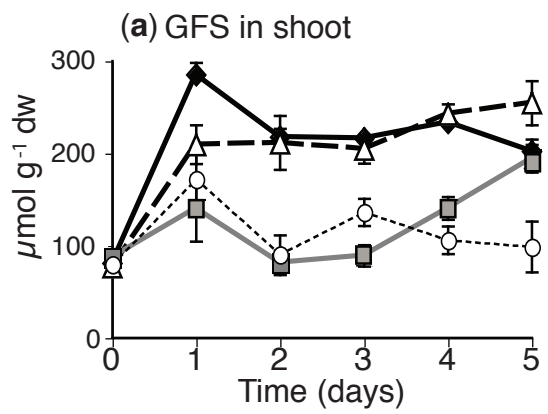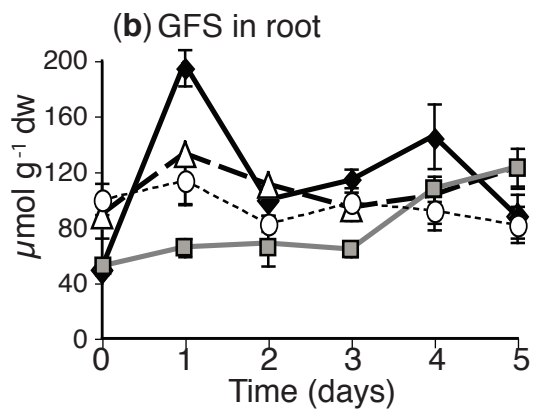

◆ E+D+  
 ▲ E-D+  
 ■ E+D-  
 ○ E-D-

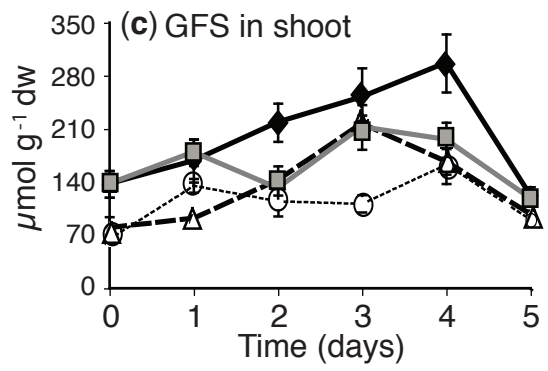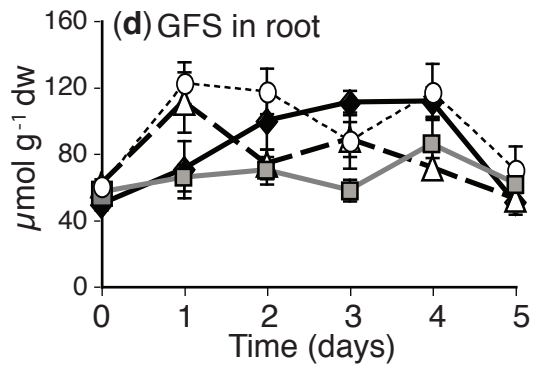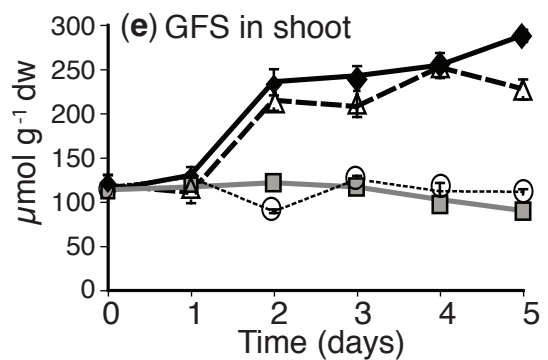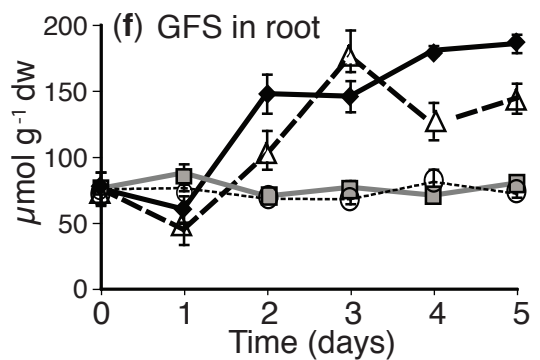

Supplement: 1471-2229-13-127-S2.pdf [file 1471-2229-13-127-S2.pdf]
